# Supplementary material for: Size discrimination in intramolecular complexation of modified α-cyclodextrins:α-Cyclodextrin = cyclomaltohexaose. a preparative and nuclear magnetic resonance studyElectronic supplementary information (ESI) available: ROESY spectra of 4′, 5, 1′, 3 and 1. See http://www.rsc.org/suppdata/p1/b1/b107324a/
Source: Royal Society of Chemistry journal article supplement (doi:10.1039/b107324a), 2001-11-23
Supplement: b107324a.doc [file b107324a.doc]

# Supplementary data

**Fig. S1.** 1H (599.957 MHz) NMR ROESY spectrum of **1'** in D2O at pD ≥ 12. The rectangles enclose the cross-peaks arising from NOE interactions between the hexyl protons and the CD H3, H5, and H6 protons.

**Fig. S2.** 1H (599.957 MHz) NMR ROESY spectrum of **3'** in D2O at pD ≥ 12.

**Fig. S3.** 1H (599.957 MHz) NMR ROESY spectrum of **4'** in D2O at pD ≥ 12. The rectangles enclose the cross-peaks arising from NOE interactions between the cubyl methyl protons and the CD H3, H5, and H6 protons.

**Fig. S4.** 1H (599.957 MHz) NMR ROESY spectrum of **5** in D2O at pD ≥ 12.

**Fig. S5.** 1H (599.957 MHz) NMR ROESY spectrum of 6A-(6-aminohexyl) amino-6A-deoxy--cyclodextrin, the CD analogue of **1**, in[2H7]-DMF. The rectangles enclose the cross-peaks arising from NOE interactions between the hexyl H2-H5 protons and the CD H3, H5, and H6 protons. The two sharp resonances amidst the CD H6A,H6A’ and hexyl H1,H6 resonances arise from [2H7]-DMF 1H impurity.
